# Supplementary material for: Profiling of Biomarkers for the Exposure of Polycyclic Aromatic Hydrocarbons: Lamin-A/C Isoform 3, Poly[ADP-ribose] Polymerase 1, and Mitochondria Copy Number Are Identified as Universal Biomarkers
Source: PubMed Central journal article supplement (PMC4121044; doi:10.1155/2014/605135), 2014-07-10
Supplement: 605135.f2.pdf [file 605135.f2.pdf]

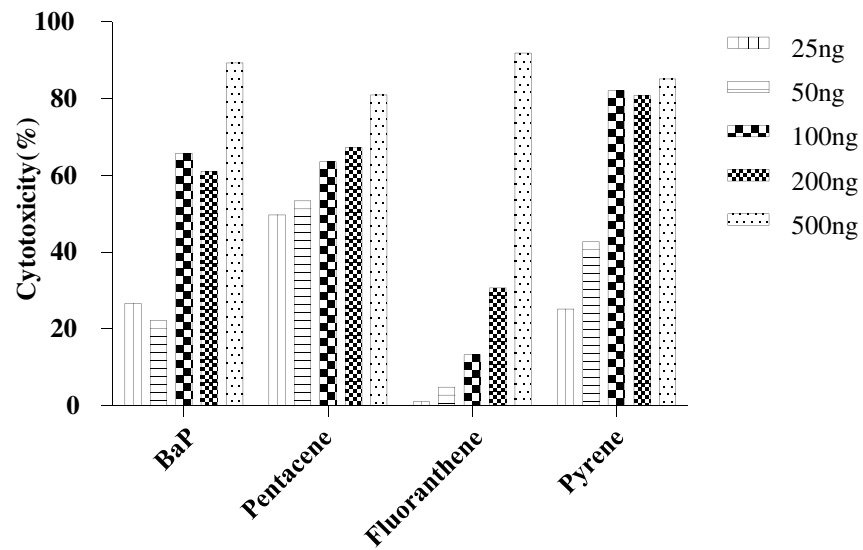

**Supplemental Fig. 1. Cytotoxic effect of PAHs compounds.** Each PAHs disclosed different degree of cytotoxic effect, but they showed it with dose-dependent manner.

Reference sequence : 10TA

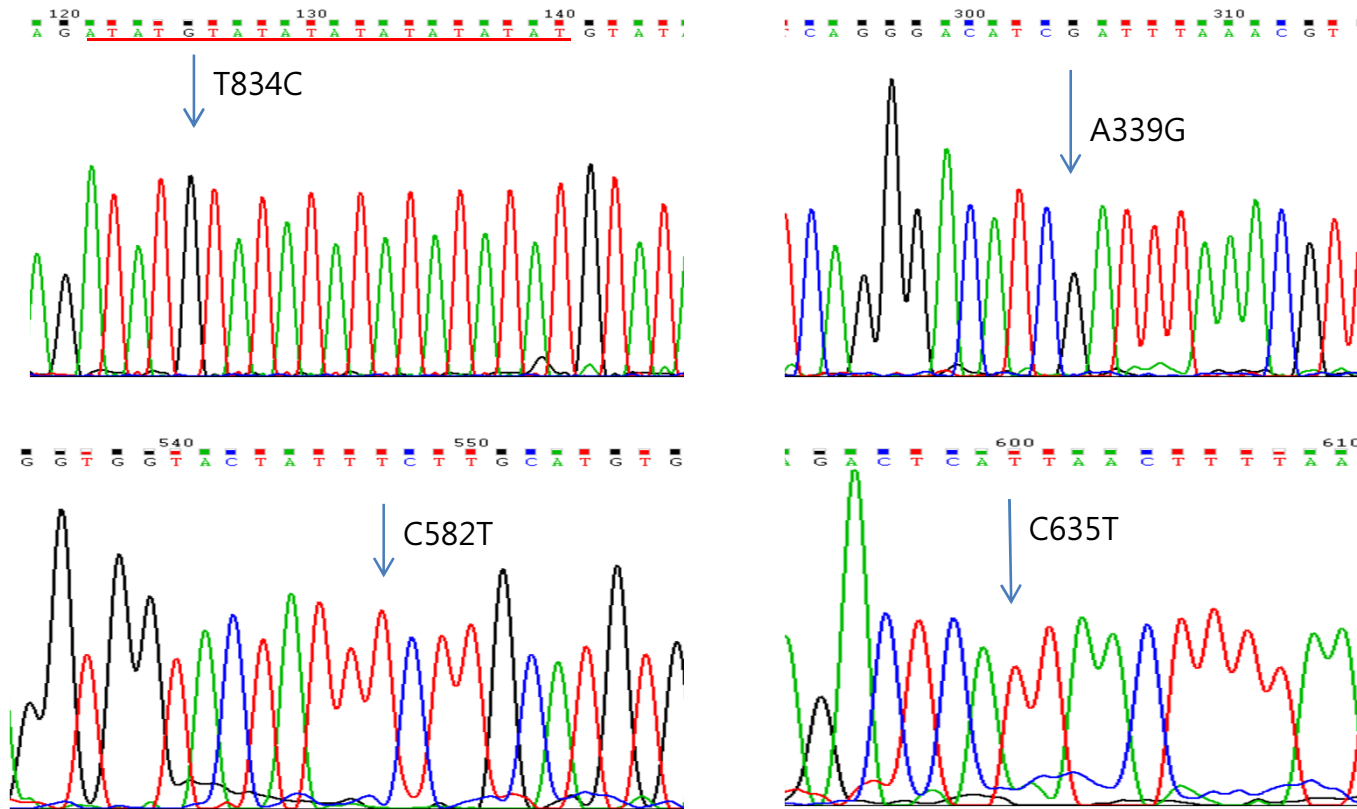

**Supplemental Fig. 2. mtDNA sequence alterations in zebrafish, which assumed polymorphisms.** However, no sequence change of mtDNA control region was found after BaP exposure.
